# Supplementary material for: The Severity of Traumatic Stress Associated with COVID-19 Pandemic, Perception of Support, Sense of Security, and Sense of Meaning in Life Among Nurses: Research Protocol and Preliminary Results from Poland
Source: Preprints.org preprint supplement (doi:10.20944/preprints202008.0176.v1), 2020-08-07
Supplement: Supplementary file 1 [file supplementary]

# The Severity of Traumatic Stress Associated with COVID-19 Pandemic, perception of Support, Sense of Security, and Sense of Meaning of Life in a Group of Professionally Active Nurses: Research Protocol and Preliminary Results from Poland

Grzegorz Józef Nowicki <sup>1,\*</sup>, Barbara Ślusarska <sup>1</sup>, Kinga Tucholska <sup>2</sup>, Katarzyna Naylor <sup>3</sup>, Agnieszka Chrzan-Rodak<sup>1</sup> and Barbara Niedorys <sup>1</sup>

Table 1S. Internal consistency of used questionnaires.

|                          | <i>alfa</i> Cronbach |
|--------------------------|----------------------|
| IES-R Total score        | 0.86                 |
| IES-R Intrusion          | 0.86                 |
| IES-R Avoidance          | 0.74                 |
| IES-R Hyperarousal       | 0.80                 |
| MSPSS Family             | 0.90                 |
| MSPSS Friends            | 0.92                 |
| MSPSS Other              | 0.90                 |
| CIOQ Positive change     | 0.72                 |
| CIOQ Negative change     | 0.78                 |
| SEQ Sense of safety      | 0.84                 |
| SEQ Reflection on safety | 0.71                 |
| MLQ Total score          | 0.82                 |
| MLQ Presence subscale    | 0.85                 |
| MLQ Search subscale      | 0.71                 |

Key: M: IES-R: Impact Event Scale-Revised; MSPSS: Multidimensional Scale of Perceived Social Support; CIOQ: Changes in Outlook Questionnaire; SEQ: Safety Experience Questionnaire; MLQ: Meaning in Life Questionnaire.
